# Supplementary material
Source: Springer Nature journal article supplement (https://www.springermedizin.de/resource/supplementary/12955_2007_412_MOESM3_ESM.pdf/9560338)

### Factor 1 after 2nd eye surgery (Visual functioning and satisfaction)

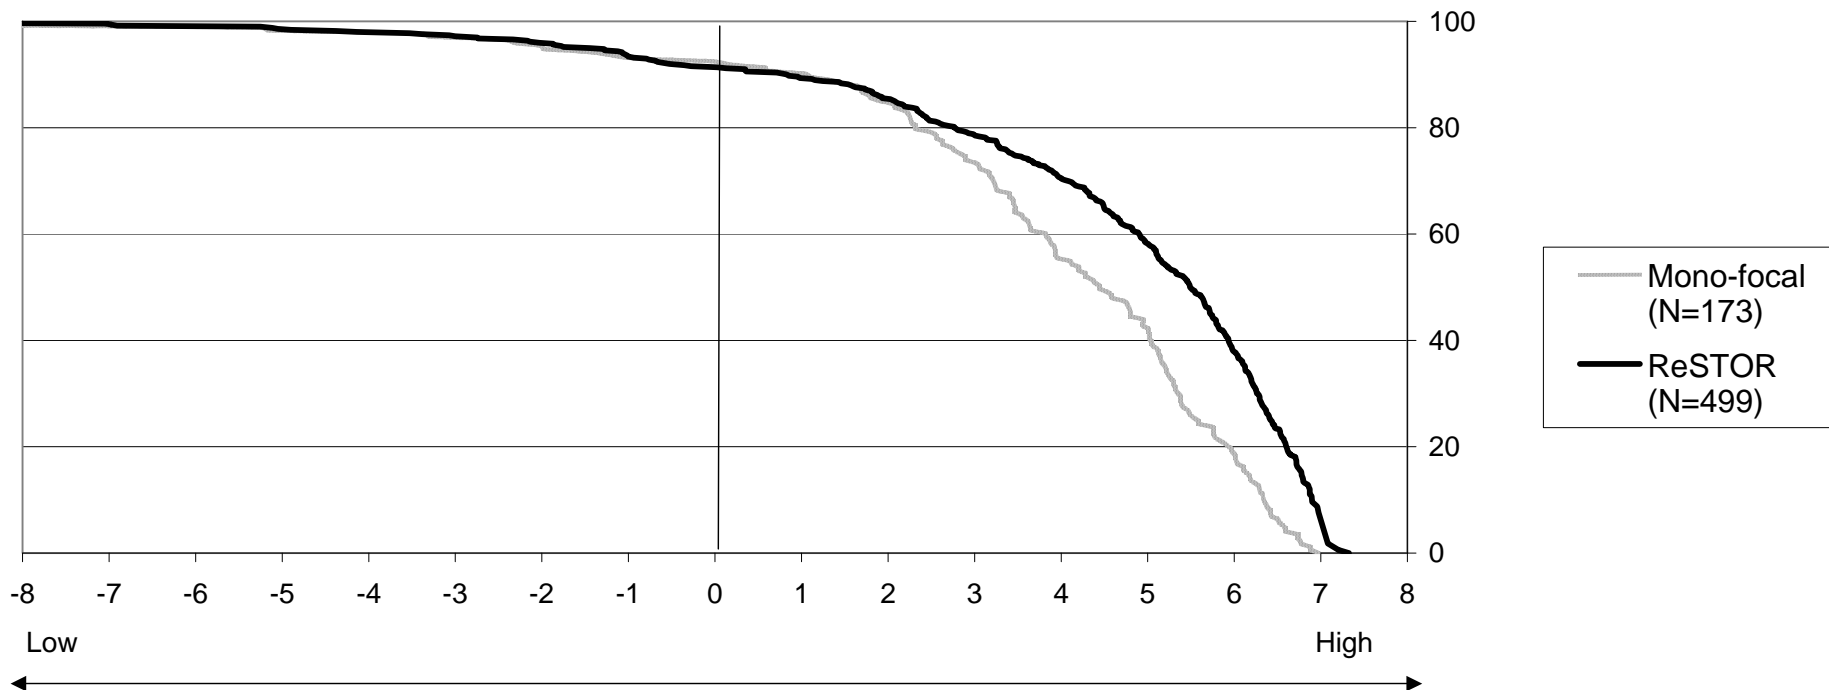

Supplement: MOESM3 [file 9560338]
